# Supplementary material for: Exploring the Impact of COVID-19 on the Nurse-Patient Relationship: A Narrative Study of Newly Graduated Nurses
Source: Research Square preprint supplement (doi:10.21203/rs.3.rs-7433765/v1), 2025-10-15
Supplement: Supplementary file 1 [file 7310bc8a4508200a07705ab8.docx]

**Supplementary material 1.** Good reporting of a mixed methods study (GRAMMS)

| **Guideline** | **Section: page** |
| --- | --- |
| Describe the justification for using a mixed methods approach the research question | Design: p.5  Strengths and limitations: p. 15 |
| Describe the design in terms of the purpose, priority, and sequence of methods | Design: p.5 |
| Describe each method in terms of sampling, data collection, and analysis | Data collection: p.6 and 7  Data analysis: p.7 |
| Describe where integration has occurred, how it has occurred, and who has participated in it | P.5-8 |
| Describe any limitation of one method associated with the presence of the other method | Strengths and limitations: p.15 |
| Describe any insights gained from mixing or integrating the methods | Discussion: p.13-17 |
