# Supplementary material for: Exploring the Impact of COVID-19 on the Nurse-Patient Relationship: A Narrative Study of Newly Graduated Nurses
Source: Research Square preprint supplement (doi:10.21203/rs.3.rs-7433765/v1), 2025-10-15
Supplement: Supplementary file 2 [file 872e5282781441fccc4d6ddc.docx]

**Supplementary material 2.** Assessment criteria

| Items | Nothing (1) | Something (2) | Sufficiently (3) | Completely (4) | |
| --- | --- | --- | --- | --- | --- |
| 1. The nurse recognises the *individual uniqueness* of the patient (sex, culture, spirituality...) and the way these influence the patient’s experience. | --- | A patient who had attempted suicide by shooting himself in the abdomen with his hunting gun (…). Difficult to treat patient: ‘his fame preceded him’. He could spend hours lying in bed, not wanting to get up or go to any therapy (...) or he would respond aggressively with an expression that seemed loaded with hatred and resentment, answering with sarcasm, passivity (...) or throwing objects that were within reach... | It was an older woman. Her admission to the floor was not due to a serious situation, nor was such a significant deterioration expected by any of the professionals who attended her. I spent a lot of time with her in the first days of admission: an endearing ‘grandmother’, one of those who touch your heart. She always had a look or a word of thanks and affection for all of us. The infection that brought her here did not respond well... | This family, whom I really care about, consists of 6 people, 4 adopted children, each from a different country, and the parents. In our office, we have treated 3 of the 4 children as patients, 2 of them with serious pathologies. The member of the family that I have looked after and followed the most has been Jon, the youngest of all, who is already 18 years old. Talking with Jon is talking about the ongoing struggle he has along with his parents to integrate, to be accepted, to continue schooling, to have friends, to learn basic social norms… |
| 1. The nurse seeks ways to *communicate* according to the patient’s uniqueness. | --- | I spent a lot of time with her, in the first few days... an endearing grandmother, one of those who touch your heart. Sometimes, when the shifts allowed me, I would visit her again. She went in the best way, surrounded by love. | After making him comfortable so he could stay 4 hours in the same position, he said, ‘Thank you very much, you are like my mother...’ Covering him and making him comfortable was something I did without thinking. | The impossibility of communicating verbally (…) forced me to develop other nonverbal skills for expressing my support, dedication, affection, and respect. My attitude at that time was to use nonverbal language, that is, the look, a hug, ‘accompanying’ so that the family would feel my intentional presence. |
| 1. The nurse demonstrates *care* in dealing with the patient. | --- | She tried to comfort her daughters... trying to give support and help, she can only cry... | That day I saw that he had time, so I invited him to come in for a visit. | I entered the room determined to provide the best care regardless of the response. I greeted the patient, trying to maintain a cordial but professional tone. I concentrated on the task, explaining to José what I was going to do. |
| 1. The nurse preserves the patient’s *privacy*. | --- | (...) that every day as I passed her, I could look into her eyes and whisper ‘how are you?’ | I extended my hand and told her that if she was nervous, she could say ‘yes’ to me and that if she was feeling bad, she could squeeze my hand. (…) With a little patience and time, I was able to get it [to communicate with her] (…) by looking at the expression on her face; I could tell that I had helped her. | I left the whole family alone so that they could express their feelings and fears and resolve pending issues. |
| 1. The nurse respects the *aspects of patient confidentiality* in any circumstance. | --- | In the narrative, it reveals the name of the patient, diagnosis, and situation that could help identify them...  . | The patient is the mother of a former colleague of the unit (nurse) who is currently working in another unit of our institution. Also, her daughter is a friend of the supervisor of this unit. [The cardioresident] is a bit reluctant to the favour I’ve asked, justified by saying she’s the grandmother of a friend of his... | There are also countless emails that both his mother and he have written to me and that I have answered, always sharing the information with the rest of the team [psychiatrists, assistants, social worker, etc.]. |
| 1. The nurse encourages the patient to be involved in making *decisions* about his or her care. | --- | I got to know their food preferences, their beliefs in how the disease should be managed, and the way they were living their moment. We are like ‘their defenders’; we watch over their care, and I believe that this allows us to know them very well. | In the operating room, especially when the patient is awake during the procedure, we like to play the music that they like; it relaxes them or distracts them during those endless minutes. Therefore, I asked what music she liked, and when she told me, the first thing I put on was the Happy Birthday song. He didn’t stop laughing. | Midmorning is approaching; the patient is better, so we offer a wash to them. Once that sensitive information was conveyed, we entered the room so that I, the morning nurse, would introduce the afternoon nurse (in this unit, they have a divider inside the patient’s room, so that the patient can be involved and be aware of his or her situation). |
| 1. The nurse shows *genuine commitment* to patient care. | --- | (...) I could only explain where to go and informed him that I would call him in a few days to take note of what happened (...). | The nurse *is ahead* in meeting some of the patient’s needs, but is not fully available. | One of the days that I went in and the patient was calm, I offered his wife to go down to have something to drink in the cafeteria or go for a walk. I promised her that I would stay in her place while she was gone. I insisted as much as I could without trying to force her, but I didn’t succeed. She thanked me, but that was all; she continued by her husband’s side. Fifteen minutes later, she rang the bell (...) without changing her sweet expression, she told me that her husband had died. (...) She told me, ‘I have taken care of him and you have taken care of us both’. Thank you’. Sometimes caring can be just to be, to be silent, to accompany and to respect the times and the silence. |
| 1. The nurse *successfully cares for* the patient. | --- | Knowing that I was relieving him... he was a very grateful person... | ... concern and fear that she was feeling... I could only explain to her where to go and… I would call her in a few days... (I could have done something more...). | I asked her what she would like, she answered ‘something fresh’. (...) I sit by her side of the bed and hold her hand; I say, ‘You feel a bit better, right? Would you like a frozen yogurt?’ The patient responds, ‘How good you are. Yes, I will try that shake’. Midmorning is approaching, the patient is better, so we offer to clean her. The nursing student, the nursing assistant and I entered the room. We take the opportunity to tell the daughter to go to breakfast, enjoy a quiet cup of coffee, and that we’ll take care of her in the meantime. When she got back, the patient told her daughter that ‘they have left me like a queen.’ |
| 1. The nurse encourages the patient to find *meaning* in their health process. | --- | Then, she said ‘thank you and sorry’, to which I could not answer, and then she said, ‘I have a 4-year-old boy’. At that moment, I understood that her problem was not the pain, nor her terminal situation, but that she only cared about her son. I stayed with her holding her hand tight and told her that she was very brave and that everything would be fine. | That phone conversation that I caught in a hallway stuck in my soul too, that damn needle, since the tears that fell and what I heard told me the concern and fears that she was feeling. (...). She told me in detail about her experience in the mutual aid hospital where she got the needle (...) her fear and discomfort because physically the treatment was causing her to vomit and be nauseous, which complicated the work and reminded her every second of the infection. | During admission, we had many conversations, but I would like to comment on one that marked me the most. First, I went upstairs to see you. You asked your mother to leave the room. ‘I am really scared’, you told me. ‘I’m dying, right?’ I got a lump in my throat. We stared at each other, our eyes filled with tears, and we could only hug each other. (...) ‘Are you afraid of death?’ you asked me. I had been talking about it for a long time. I said that ‘death is something I respect, fear?’ No because I know what comes next, perhaps selfishness for not wanting to leave what I have here, but fear as such, no’. We continued talking. She was very afraid of suffering physically, of being in pain, of noticing if the time came, that it would be difficult for her to breathe. |
